# Supplementary material for: Stimuli-responsive hydrogel microfibers with controlled anisotropic shrinkage and cross-sectional geometries
Source: Royal Society of Chemistry journal article supplement (doi:10.1039/c7sm00279c), 2017-01-01
Supplement: c7sm00279c4.pdf [file c7sm00279c4.pdf]

## Supporting Information

### **Stimuli-responsive Hydrogel Microfibers with Controlled Anisotropic Shrinkage and Cross-sectional Geometries**

*Shunsuke Nakajima, Ryuji Kawano, Hiroaki Onoe\**

#### **Figure S1. Fabrication of stimuli-responsive microfiber**

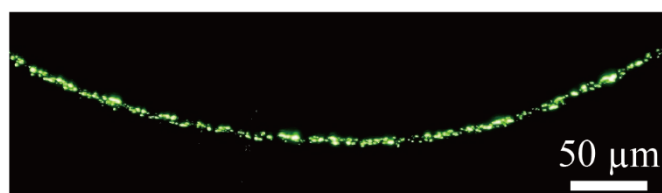

**Figure S1.** Fluorescence image of a microfiber with a diameter of approximately 10  $\mu\text{m}$  when using a glass capillary with a diameter and a flow rate of 7  $\mu\text{m}$  and 0.05  $\mu\text{L/s}$ .

#### **Movie S1. Fabrication of single-layered and double-layered microfiber**

#### **Movie S2. Folding of double-layered microfiber**

#### **Movie S3. Pumping of hollow microfiber**
